# Supplementary material for: Low-Temperature and Additive-Free Synthesis of Spherical MIL-101(Cr) with Enhanced Dye Adsorption Performance
Source: MDPI journal article supplement (doi:10.3390/inorganics10030033), 2022-03-04
Supplement: s1 [file s1]

## Article

# Low-Temperature and Additive-Free Synthesis of Spherical MIL-101(Cr) with Enhanced Dye Adsorption Performance

Tian Zhao \*, Hexin Zhu, Ming Dong, Minmin Zou, Songfan Tang, Mingliang Luo and Xianggang Li \*

School of Packaging and Materials Engineering, Hunan University of Technology, Zhuzhou 412007, China; zhx19a@126.com (H.Z.); dongming666@126.com (M.D.); zz09181002@163.com (M.Z.); m15279857328@163.com (S.T.); westbrook123666@163.com (M.L.)

\* Correspondence: tian\_zhao@hut.edu.cn (T.Z.); lixianggang@hut.edu.cn (X.L.)

**Abstract:** The chromium-benzenedicarboxylate metal–organic framework (MOF), MIL-101(Cr), is one of the most well-investigated and widely used prototypical MOFs. Regarding its synthesis, the use of a toxic modulator (usually HF) and high reaction temperature (220 °C) are the main factors hindering its further expansion of production and utilization. In fact, high quality MIL-101(Cr) crystals can be prepared at a much lower temperature (160 °C) with spherical morphology via an additive-free approach. Compared to traditional octahedral MIL-101(Cr), the spherical MIL-101(Cr) possesses higher adsorption performance toward dye molecules, including methyl orange (MO) and rhodamine B (RB). The results suggest that toxic additives and high reaction temperatures are not essential in the synthesis of MIL-101(Cr), and the fabrication of spherical MIL-101(Cr) may offer a facile and effective pathway for the large-scale industrial application of MIL-101(Cr).

**Keywords:** spherical MIL-101(Cr); morphology control; dye adsorption; industrial application

**Citation:** Zhao, T.; Zhu, H.; Dong, M.; Zou, M.; Tang, S.; Luo, M.; Li, X. Low-Temperature and Additive-Free Synthesis of Spherical MIL-101(Cr) with Enhanced Dye Adsorption Performance. *Inorganics* **2022**, *10*, 33. <https://doi.org/10.3390/inorganics10030033>

Academic Editors: Koichiro Takao

Received: 9 February 2022

Accepted: 28 February 2022

Published: 4 March 2022

**Publisher's Note:** MDPI stays neutral with regard to jurisdictional claims in published maps and institutional affiliations.

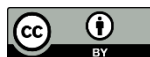

**Copyright:** © 2022 by the authors. Licensee MDPI, Basel, Switzerland. This article is an open access article distributed under the terms and conditions of the Creative Commons Attribution (CC BY) license (<https://creativecommons.org/licenses/by/4.0/>).

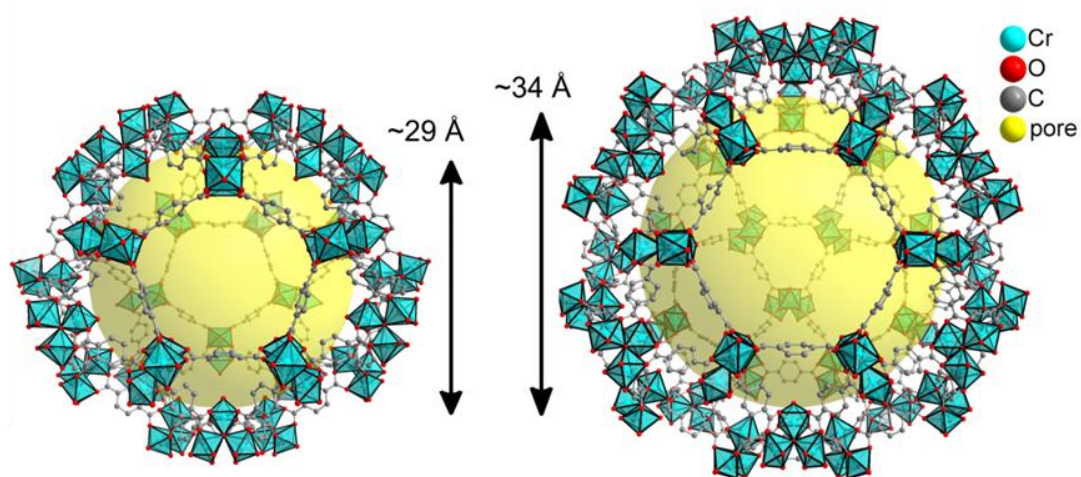

Benzene-1,4-dicarboxylate ligands bridge between trinuclear  $\{Cr_3O\}$  building units; small cage with pentagonal windows and large cage with pentagonal and hexagonal windows with pore diameters (yellow spheres); the yellow spheres in the mesoporous cages with diameter of 2.9 or 3.4 Å, respectively, taking into account the van der Waals radii of the framework walls; water-guest molecules are not shown (CSD-Refcode OCUNAK)

**Figure S1.** Building blocks for MIL-101(Cr).

**Table S1.** Price parameters of MIL-101(Cr) sold by various manufacturers.

| <b>Names and Specifications</b>                              | <b>Unit Price</b> | <b>Manufacturer</b>                    |
|--------------------------------------------------------------|-------------------|----------------------------------------|
| MIL-101(Cr)<br>BET: 2800-3200 m <sup>2</sup> g <sup>-1</sup> | 237.1 \$/g        | Kaishu Chemical Technology Co., Ltd.   |
| MIL-101(Cr)<br>BET: NA*                                      | 221.3 \$/g        | Yanqu Information Technology Co., Ltd. |
| MIL-101(Cr)<br>BET:NA                                        | 347.8 \$/g        | Ruixi Biological Technology Co., Ltd.  |
| MIL-101(Cr)<br>BET: 2800-3200 m <sup>2</sup> g <sup>-1</sup> | 237.1 \$/g        | Qiyue Biological Technology Co., Ltd.  |
| MIL-101(Cr)<br>BET: 2800-3200 m <sup>2</sup> g <sup>-1</sup> | 577.0 \$/g        | Yinuokai Technology Co., Ltd.          |
| MIL-101(Cr)<br>BET: 2800-3200 m <sup>2</sup> g <sup>-1</sup> | 474.3 \$/g        | Warwick Ruike Chemical Co., Ltd.       |
| MIL-101(Cr)<br>BET: 2800-3200 m <sup>2</sup> g <sup>-1</sup> | 316.2 \$/g        | Pusai Chemical Products Co., Ltd.      |
| MIL-101(Cr)<br>BET: 2800-3200 m <sup>2</sup> g <sup>-1</sup> | 284.6 \$/g        | Alpha Chemical Co., Ltd.               |
| MIL-101(Cr)<br>BET: 2800-3200 m <sup>2</sup> g <sup>-1</sup> | 237.1 \$/g        | Lavoisier Chemical Products Co., Ltd.  |
| MIL-101(Cr)<br>BET: 2800-3200 m <sup>2</sup> g <sup>-1</sup> | 579.6 \$/g        | Alfa Chemistry (USA)                   |

\*When no BET surface area were given (NA).

**Table S2.** BET specific surface area, pore volume and yield of MIL-101(Cr) synthesized by various additives.

| Additive                       | $S_{\text{BET}}$<br>/( $\text{m}^2 \text{g}^{-1}$ ) | $V_{\text{pore}}$<br>/( $\text{cm}^3 \text{g}^{-1}$ ) | Yield<br>/% <sup>b</sup> | References |
|--------------------------------|-----------------------------------------------------|-------------------------------------------------------|--------------------------|------------|
| Hydrofluoric Acid <sup>a</sup> | 4100                                                | 2.02                                                  | ~50                      | [19]       |
| Hydrofluoric Acid              | 3609                                                | 1.55                                                  | 46                       | [32]       |
| Hydrofluoric Acid              | 2887                                                | 1.45                                                  | 38                       | [33]       |
| Hydrofluoric Acid              | 3498                                                | 1.72                                                  | 49                       | [34]       |
| Hydrofluoric Acid              | 2089                                                | 1.00                                                  | 63                       | [35]       |
| Acetic acid                    | 3550                                                | 2.38                                                  | 71.2                     | [37]       |
| Nitric acid                    | 3841                                                | 1.72                                                  | 78                       | [34]       |
| Hydrochloric acid              | 1720                                                | 0.87                                                  | NA                       | [38]       |
| Sulfuric acid                  | 838                                                 | 0.77                                                  | NA                       | [39]       |
| Sodium hydroxide               | 3223                                                | 1.57                                                  | 37                       | [40]       |
| Benzoic acid                   | 3467                                                | 2.38                                                  | NA                       | [41]       |
| Sodium acetate                 | 3790                                                | 1.76                                                  | NA                       | [42]       |
| Tetramethylammonium hydroxide  | 2939                                                | 1.55                                                  | 51                       | [34]       |

<sup>a</sup>The preparation followed the original hydrothermal synthesis procedure by Férey et al [19]. <sup>b</sup>The yield is based on Cr and refers to the isolated material after the washing procedures. When no yields were given (NA) and the original procedure by Férey et al [19].

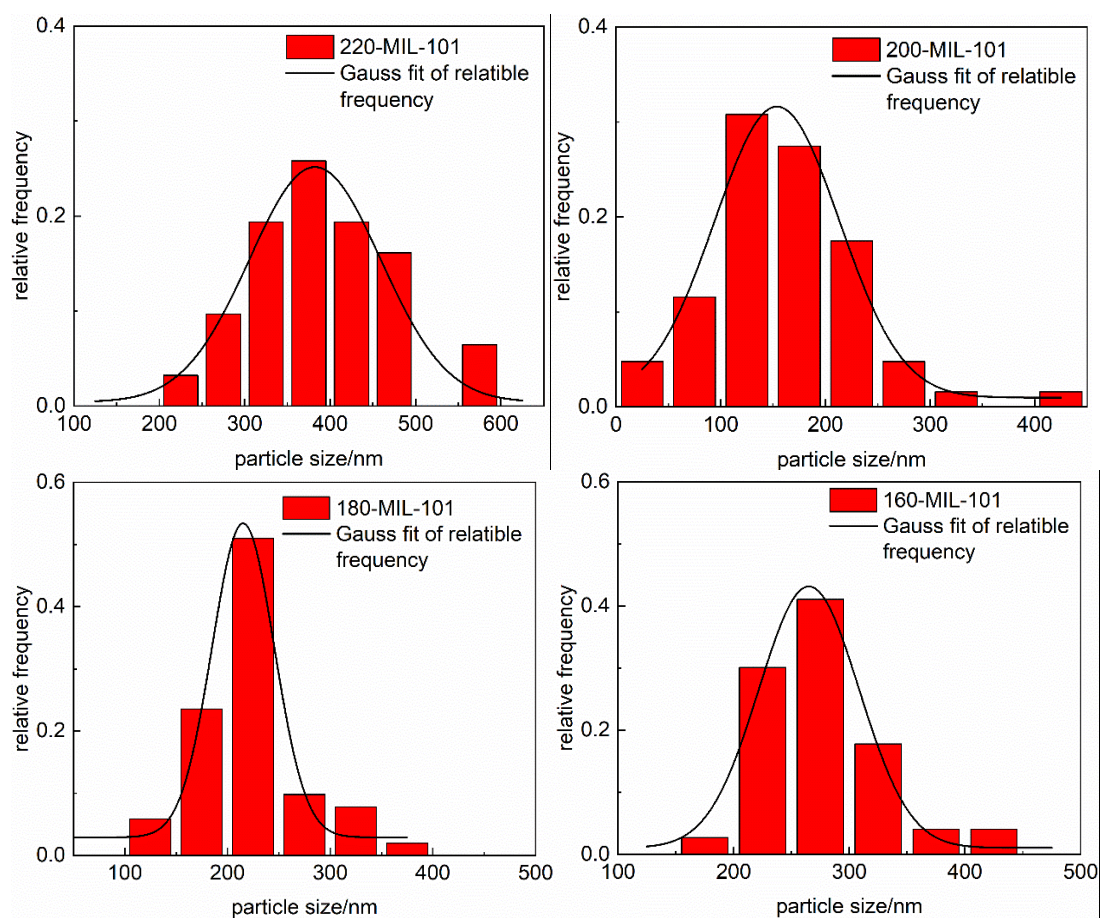

**Figure S2.** Particle size distribution of samples.

**Table S3.** Adsorption capacities ( $q_{max}$ ) of MO on other MIL-101 and MIL-101 composite.

| Adsorbents                            | $q_{max}$ (mg g <sup>-1</sup> ) | Ref.      |
|---------------------------------------|---------------------------------|-----------|
| MIL-101                               | 140                             | [61]      |
| MIL-101                               | 87.5                            | [73]      |
| 150@MIL-101                           | 420.2                           | [74]      |
| MIL-101-Cr                            | 196.1                           | [75]      |
| Hierarchically mesostructured MIL-101 | 277.8                           | [76]      |
| TiO <sub>2</sub> /MIL-101(Cr)         | 240                             | [23]      |
| MIL-101(Cr)/GA                        | 331.5                           | [77]      |
| GrO/MIL-101(Cr)                       | 381                             | [78]      |
| 160-MIL-101                           | 444.3                           | This work |

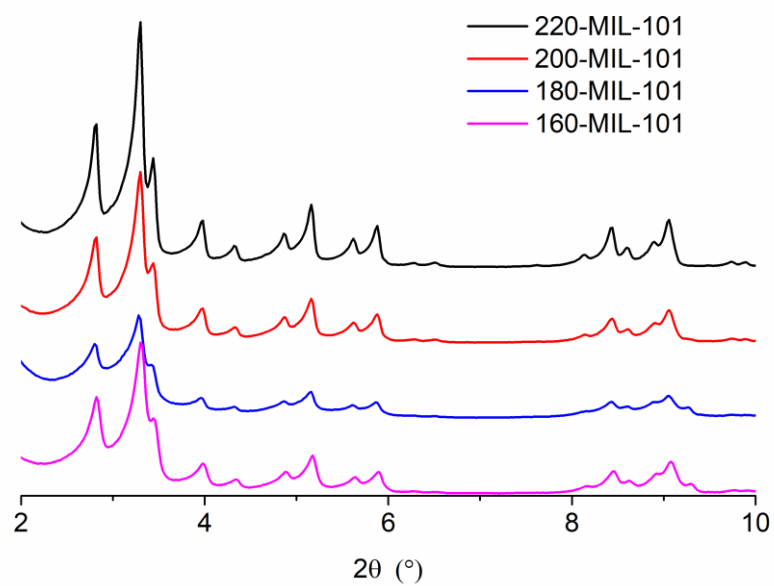

**Figure S3.** The low-angle region of the PXRD patterns of all MIL-101(Cr)s.

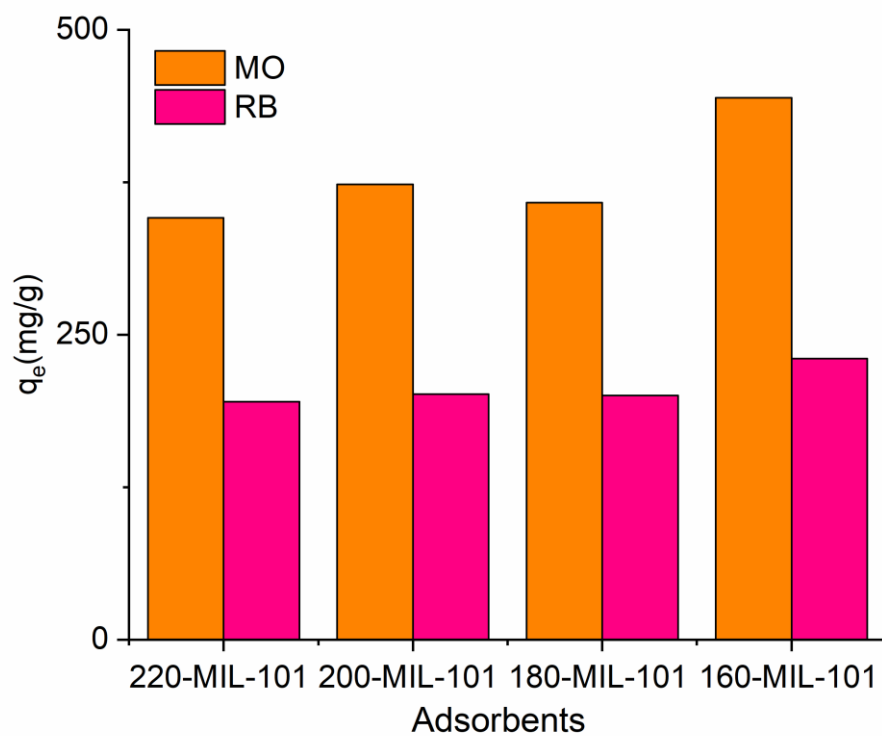

**Figure S4.** The adsorption capabilities of all MIL-101(Cr)s toward MO and RB.



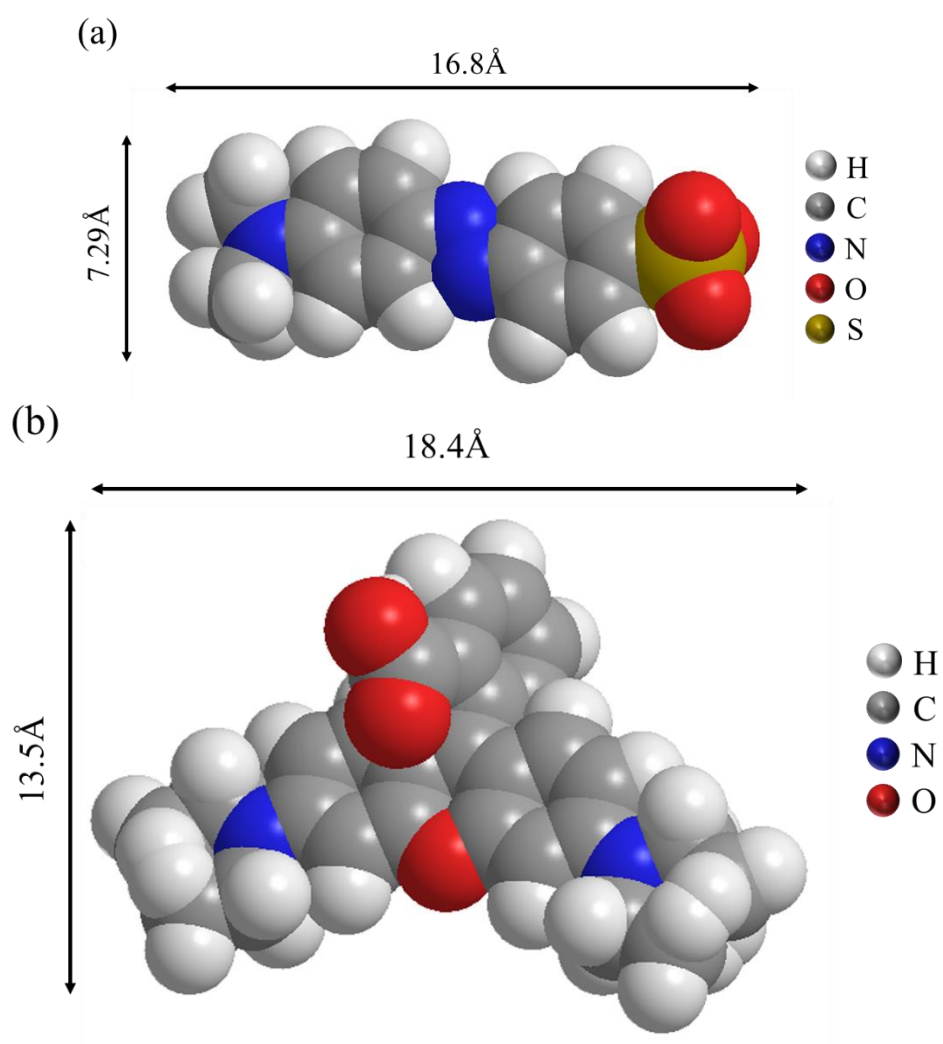

**Figure S5.** Dye molecule diagram, (a) MO and (b) RB.

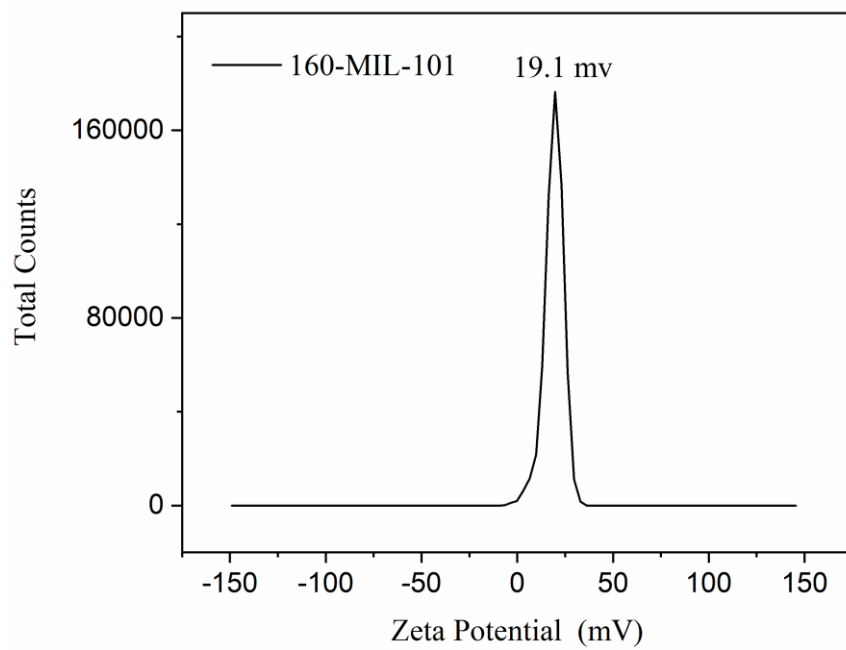

**Figure S6.** Zeta potential of 160-MIL-101 directly dispersed in water.

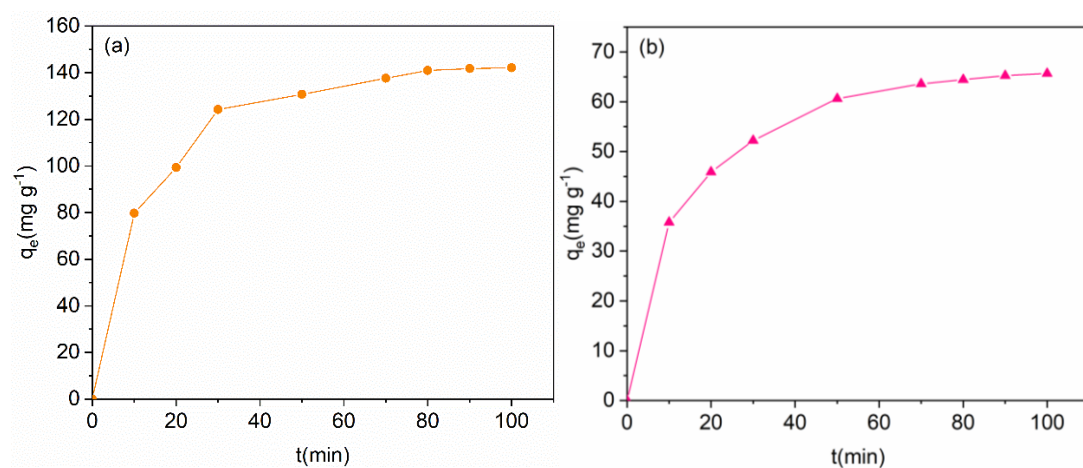

**Figure S7.** Impact of the time on the adsorption of (a) MO and (b) RB onto 160-MIL-101.

**Table S4.** Characteristic parameters of the adsorption of dyes on the 160-MIL-101.

|                     |                     | Parameter                                                        | MO                   | RB                    |
|---------------------|---------------------|------------------------------------------------------------------|----------------------|-----------------------|
| Adsorption kinetics | Pseudo-first-order  | $q_{e,Exp}$ (mg g <sup>-1</sup> )                                | 164.7                | 74.5                  |
|                     |                     | $q_{e,Cal}$ (mg g <sup>-1</sup> )                                | 79.1                 | 38.5                  |
|                     |                     | $k_I$ (min <sup>-1</sup> )                                       | 0.0142               | 0.01632               |
|                     |                     | $R^2$                                                            | 0.905                | 0.948                 |
|                     | Pseudo-second-order | $q_{e,Exp}$ (mg g <sup>-1</sup> )                                | 164.7                | 74.5                  |
|                     |                     | $q_{e,Cal}$ (mg g <sup>-1</sup> )                                | 157.2                | 73.4                  |
|                     |                     | $k_2$ (g mg <sup>-1</sup> min <sup>-1</sup> )                    | 6.5×10 <sup>-4</sup> | 1.21×10 <sup>-3</sup> |
|                     |                     | $R^2$                                                            | 0.999                | 0.999                 |
|                     | Tempkin             | $A$ (L g <sup>-1</sup> )                                         | 84.5                 | 0.17                  |
|                     |                     | $B$                                                              | 46.7                 | 66.5                  |
| $R^2$               |                     | 0.760                                                            | 0.895                |                       |
| Adsorption isotherm | Freundlich          | $n$                                                              | 6.7                  | 2.2                   |
|                     |                     | $k_F$ (mg g <sup>-1</sup> (L mg <sup>-1</sup> ) <sup>1/n</sup> ) | 209.1                | 21.6                  |
|                     |                     | $R^2$                                                            | 0.704                | 0.7960                |
|                     | Langmuir            | $q_{m,Exp}$ (mg g <sup>-1</sup> )                                | 444.3                | 230.3                 |
|                     |                     | $q_{m,Cal}$ (mg g <sup>-1</sup> )                                | 446.4                | 291.6                 |
|                     |                     | $k_L$ (L mg <sup>-1</sup> )                                      | 0.431                | 0.018                 |
|                     |                     | $R^2$                                                            | 0.999                | 0.969                 |

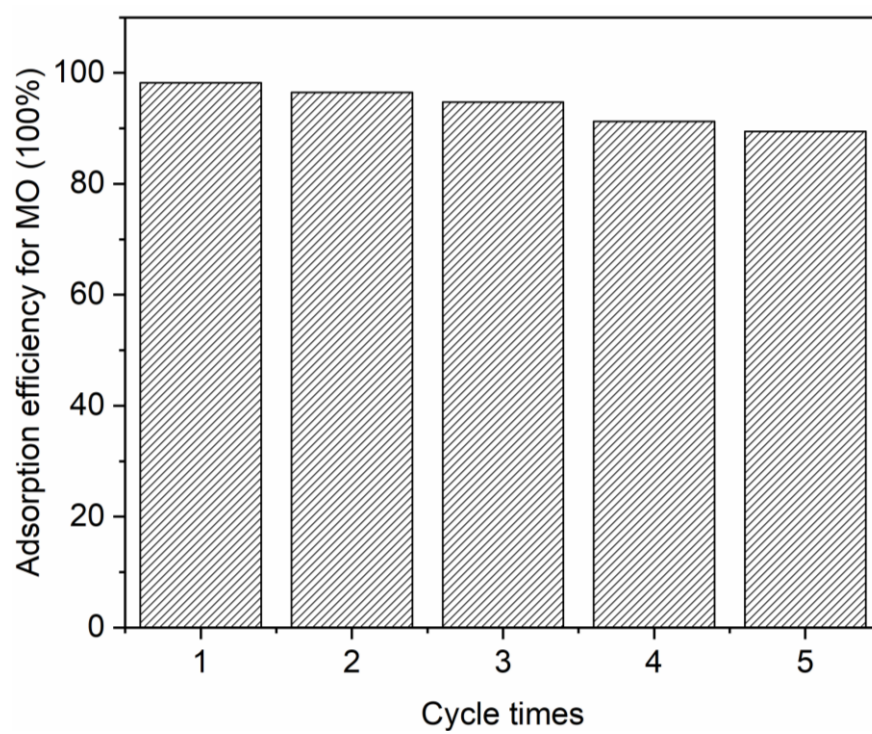

**Figure S8.** Recycle of the removal efficiency of 160-MIL-101 for MO.
